# Supplementary material for: Relationships between consumption of ultra-processed foods, gestational weight gain and neonatal outcomes in a sample of US pregnant women
Source: PeerJ. 2017 Dec 7;5:e4091. doi: 10.7717/peerj.4091 (PMC5723430; doi:10.7717/peerj.4091)
Supplement: Data S6 [file peerj-05-4091-s007.csv]

id_	milkadded_17f	milkaddedcup_17h	vegfattablefreq_47	vegfatquant_47b	saucequant_47c	sourcreamfreq_55b	sourcreamquant_55c	margarinefreq_55d	pbutterfreq_55e	margbutquant_55f	cheesefreq_55g	cheesequant_55h	panmargfreq_64b	panbutterfreq_64c	panmargbutterquant_64d	syrupfreq_64e	syrupquant_64f	bmargfreq_69c	bbutterfreq_69d	bmargbutquant_69e	creamcheesefreq_69f	creamcheesequant_69g	mayonnaisefreq_70c	mayonnaisequant_70d	breadmargfreq_70e	breadbutterfreq_70f	breadmargbutquant_70g	bnsmargfreq_71c	bnsbutterfreq_71d	bnsmargbutterquant_71e	bnscreamcheesefreq_71f	bnscreamcheesequant_71g	sugardrinkfreq_132a	sugardrinkquant_132b	artsweetfreq_132c	artsweetquant_132e	nondairyfreq_133a	nondairyquant_133b	creamfreq_133d	creamquant_133e	milkdrinkfreq_133f	milkdrinkquant_133g
LOX-01	2	1	2.5	3	3	3	2	1	5	3	3	2	1	5	3	5	2	0	0	0	0	0	5	2	1	5	3	1	5	3	2	2	0	0	0	0	0	0	0	0	0	0
LOX-010	2	2	0	0	0	1	0	1	5	3	5	2	1	3	3	5	2	0	0	0	0	0	5	2	1	1	1	1	5	3	1	0	0	0	0	0	0	0	0	0	0	0
LOX-011	2	2	0	0	0	1	0	5	1	4	1	0	5	1	3	1	0	1	1	1	5	2	1	0	1	1	1	1	1	1	1	0	5	2	1	0	0	0	0	0	0	0
LOX-012	2	3	0	0	0	3	2	5	5	4	2	2	5	5	3	5	3	0	0	0	0	0	1	0	1	1	1	3	3	2	1	0	5	1	1	0	0	0	0	0	0	0
LOX-014	0	0	0	0	0	0	0	0	0	0	0	0	5	5	4	5	2	1	1	1	5	2	5	2	1	1	1	0	0	0	0	0	0	0	0	0	0	0	0	0	0	0
LOX-015	2	2	6.5175	3	3	3	2	3	2	3	2	2	3	1	3	5	2	5	1	3	1	0	3	2	1	1	1	5	2	3	1	0	0	0	0	0	0	0	0	0	0	0
LOX-016	2	3	0	0	0	3	2	3	3	2	1	0	0	0	0	0	0	0	0	0	0	0	5	2	1	1	1	5	NA	2	1	0	0	0	0	0	0	0	0	0	0	0
LOX-017	2	2	0	0	0	1	0	2	1	3	1	0	2	1	2	5	3	1	1	1	5	2	1	0	1	1	1	5	1	2	1	0	0	0	0	0	0	0	0	0	0	0
LOX-018	2	1	0	0	0	3	3	5	4	3	5	2	2	3	2	1	0	0	0	0	0	0	0	0	0	0	0	2	1	2	1	0	0	0	0	0	0	0	0	0	0	0
LOX-019	2	3	2.5	3	3	5	2	5	5	3	5	2	5	1	3	3	2	1	1	1	5	2	5	2	1	1	1	5	1	3	1	0	5	2	5	3	0	0	0	0	0	0
LOX-02	2	2	23.8975	2	2	1	0	1	1	1	1	0	5	5	4	3	3	0	0	0	0	0	3	2	3	2	2	3	3	3	3	3	0	0	0	0	0	0	0	0	0	0
LOX-020	2	3	15.2075	1	1	1	0	2	1	3	1	0	5	1	3	5	2	0	0	0	0	0	1	0	1	1	1	1	1	1	1	0	0	0	0	0	0	0	0	0	0	0
LOX-021	2	3	2.5	1	1	1	0	1	3	2	1	0	1	5	3	5	3	1	5	3	1	0	3	2	1	3	3	1	5	3	1	0	0	0	0	0	1	0	1	0	3	3
LOX-022	2	2	6.5175	2	2	1	0	5	3	2	2	1	1	5	3	5	3	0	0	0	0	0	1	0	1	2	2	1	5	2	1	0	5	2	5	3	0	0	0	0	0	0
LOX-023	2	2	0	0	0	1	0	1	5	2	1	0	NA	5	2	5	2	0	0	0	0	0	2	1	1	1	1	5	5	2	1	0	0	0	0	0	0	0	0	0	0	0
LOX-026	1	0	0	0	0	1	0	1	5	3	3	2	1	1	1	1	0	0	0	0	0	0	1	0	1	1	1	1	1	1	1	0	0	0	0	0	0	0	0	0	0	0
LOX-027	0	0	0	0	0	1	0	1	3	3	1	0	1	5	2	1	0	1	1	1	5	2	5	1	1	1	1	1	3	3	1	0	0	0	0	0	0	0	0	0	0	0
LOX-029	2	3	0	0	0	1	0	3	1	3	1	0	1	5	2	5	2	0	0	0	0	0	2	1	1	1	1	1	2	2	1	0	0	0	0	0	0	0	0	0	0	0
LOX-03	1	0	0	0	0	2	1	2	1	2	2	1	2	2	2	5	2	0	0	0	0	0	1	0	1	1	1	1	1	1	1	0	0	0	0	0	0	0	0	0	0	0
LOX-030	2	3	0	0	0	1	0	1	3	2	1	0	1	5	2	5	2	1	1	1	5	2	3	2	1	1	1	0	0	0	0	0	0	0	0	0	0	0	0	0	0	0
LOX-033	2	2	2.5	0	3	1	0	1	1	1	1	0	1	3	2	4	2	1	1	1	5	2	1	0	1	3	2	1	3	2	1	0	0	0	0	0	0	0	0	0	0	0
LOX-034	2	2	0	3	1	1	0	1	1	1	3	2	1	1	1	2	2	0	0	0	1	0	3	2	1	1	1	3	3	2	1	0	5	2	1	0	0	0	0	0	0	0
LOX-035	2	3	0	0	0	1	0	1	5	3	1	0	1	1	1	1	0	0	0	0	0	0	5	3	1	1	1	0	0	0	0	0	0	0	0	0	0	0	0	0	0	0
LOX-036	2	2	15.2075	2	3	1	0	5	1	3	1	0	1	1	2	5	2	0	0	0	0	0	2	1	1	1	1	0	0	0	0	0	5	1	5	1	1	0	5	1	1	0
LOX-037	2	2	0	0	0	5	2	5	5	3	1	0	5	1	3	3	2	2	2	4	3	3	1	0	2	2	3	2	2	4	1	0	2	1	1	0	0	0	0	0	0	0
LOX-038	2	2	1	1	3	1	0	2	2	3	1	0	5	5	3	5	2	1	1	1	5	3	5	2	4	4	3	1	1	1	1	0	0	0	0	0	4	2	4	2	2	2
LOX-039	2	2	0	0	0	3	2	5	1	3	2	2	1	5	3	5	2	0	0	0	0	0	3	2	1	5	3	1	5	3	1	0	5	2	1	0	1	0	1	0	5	2
LOX-043	2	2	2.5	1	4	1	0	1	5	3	3	2	1	5	2	5	2	0	0	0	0	0	5	2	1	1	1	1	5	3	1	0	0	0	0	0	0	0	0	0	0	0
LOX-044	2	3	0	0	0	1	0	5	5	3	1	0	5	1	3	5	2	0	0	0	0	0	5	1	1	1	1	0	0	0	0	0	5	2	5	3	4	2	1	0	4	3
LOX-045	2	3	0	0	0	2	1	5	1	2	1	0	5	1	3	5	2	0	0	0	0	0	5	1	2	1	2	5	1	2	1	0	0	0	0	0	0	0	0	0	0	0
LOX-046	2	3	0	0	0	NA	2	4	4	3	1	0	4	4	3	5	2	0	0	0	0	0	3	2	1	3	2	3	2	3	1	0	0	0	0	0	0	0	0	0	0	1
LOX-047	2	2	2.5	0	3	2	1	2	1	2	1	0	5	1	2	5	2	2	1	2	1	0	2	1	1	1	1	1	1	1	1	0	0	0	0	0	0	0	0	0	0	0
LOX-051	2	3	2.5	1	2	0	0	0	0	0	0	0	1	1	1	5	2	1	1	1	5	1	5	1	1	1	1	0	0	0	0	0	0	0	0	0	5	2	1	0	0	0
LOX-053	1	0	0	0	0	1	0	1	1	1	1	0	1	1	1	1	0	0	0	0	0	0	1	0	1	1	1	5	1	2	1	0	0	0	0	0	0	0	0	0	0	0
LOX-055	2	2	30.415	2	2	1	0	1	3	3	1	0	1	1	1	5	2	0	0	0	0	0	2	1	1	1	1	1	5	2	1	0	5	2	1	0	1	0	5	2	5	2
LOX-056	2	2	6.5175	0	0	3	2	1	4	4	1	0	1	4	4	5	2	1	4	3	3	3	1	0	1	1	0	1	4	4	1	0	0	0	0	0	0	0	0	0	0	0
LOX-057	2	2	2.5	2	4	3	2	2	2	3	2	3	1	1	1	3	1	2	2	3	3	3	1	0	1	1	1	2	2	3	1	0	0	0	0	0	0	0	0	0	0	0
LOX-059	2	3	2.5	2	3	2	1	3	2	2	4	2	2	2	2	4	2	0	0	0	0	0	5	2	1	1	1	1	1	1	1	0	0	0	0	0	0	0	0	0	0	0
LOX-06	2	1	0	0	0	5	2	1	1	0	5	2	5	5	3	5	2	1	1	1	5	2	1	0	1	1	1	0	0	0	0	0	0	0	0	0	0	0	0	0	0	0
LOX-060	2	3	2.5	1	1	2	2	5	5	2	4	2	5	5	2	5	2	2	1	2	4	3	2	1	1	1	2	5	1	2	1	0	5	2	1	0	1	0	5	2	1	0
LOX-061	2	2	0	0	0	2	1	2	2	3	1	0	0	0	0	0	0	0	0	0	0	0	3	2	1	1	1	0	0	0	0	0	0	0	0	0	0	0	0	0	0	0
LOX-062	0	0	0	0	0	0	0	0	0	0	0	0	1	1	1	1	0	0	0	0	1	0	1	0	1	1	1	1	2	2	1	0	0	0	0	0	1	0	1	0	5	2
LOX-063	2	2	0	0	0	1	0	1	2	2	2	1	0	3	2	1	0	0	0	0	0	0	5	1	1	1	1	1	3	2	1	0	0	0	0	0	0	0	0	0	0	0
LOX-064	2	2	15.2075	2	3	1	0	2	1	2	1	0	2	2	2	2	1	1	1	1	5	1	1	0	1	1	1	1	1	1	1	0	0	0	0	0	0	0	0	0	0	0
LOX-065	1	0	23.8975	1	1	3	1	2	1	2	1	0	5	5	2	5	2	1	1	1	5	2	5	1	1	1	1	0	0	0	0	0	5	2	1	0	5	2	1	0	1	0
LOX-08	2	2	6.5175	2	2	3	2	3	4	3	1	0	4	4	3	5	3	0	0	0	0	0	5	2	3	3	2	0	0	0	1	1	0	0	0	0	0	0	0	0	0	0
LOX-09	2	2	6.5175	2	3	3	2	4	4	2	3	2	1	5	2	5	2	0	0	0	0	0	5	1	1	1	1	0	0	0	0	0	0	0	0	0	0	0	0	0	0	0
